# Supplementary material for: Identification of MRP2 as a targetable factor limiting oxaliplatin accumulation and response in gastrointestinal cancer
Source: PubMed Central journal article supplement (PMC6381153; doi:10.1038/s41598-019-38667-8), 2019-02-19
Supplement: 41598_2019_38667_MOESM1_ESM.pdf [file 41598_2019_38667_MOESM1_ESM.pdf]

## Identification of MRP2 as a targetable factor limiting oxaliplatin accumulation and response in gastrointestinal cancer

Khine Myint<sup>1</sup>, Riya Biswas<sup>2</sup>, Yan Li<sup>2,3</sup>, Nancy Jong<sup>1</sup>, Stephen Jamieson<sup>1,4</sup>, Johnson Liu<sup>5</sup>, Catherine Han<sup>1,4</sup>, Christopher Squire<sup>6</sup>, Fabrice Merien<sup>2</sup>, Jun Lu<sup>2,3</sup>, Takeo Nakanishi<sup>7</sup>, Ikumi Tamai<sup>7</sup>, Mark McKeage<sup>1,4</sup>

### Affiliations:

1 Department of Pharmacology and Clinical Pharmacology, University of Auckland, Auckland, New Zealand;

2 AUT-Roche Diagnostics Laboratory, School of Science, Auckland University of Technology, Auckland, New Zealand;

3 School of Interprofessional Health Studies, Auckland University of Technology, Auckland, New Zealand;

4 Auckland Cancer Society Research Centre, University of Auckland, Auckland, New Zealand;

5 Department of Pharmacology, School of Medical Sciences, University of New South Wales, Sydney, NSW 2052, Australia

6 School of Biological Sciences, University of Auckland, Auckland, New Zealand;

7 Department of Membrane Transport and Biopharmaceutics, Faculty of Pharmaceutical Sciences, Institute of Medical, Pharmaceutical and Health Sciences, Kanazawa University, Kakuma-machi, Kanazawa 920-1192, Japan

Correspondence: Professor Mark McKeage, Department of Pharmacology and Clinical Pharmacology and Auckland Cancer Society Research Centre, School of Medical Sciences, Faculty of Medical and Health Sciences, University of Auckland, Private Bag 92129 Auckland, New Zealand; email [m.mckeage@auckland.ac.nz](mailto:m.mckeage@auckland.ac.nz); tel +6493737599 x87322; Fax +6499347584

Supplementary table 1 Two-way repeated measures ANOVA multiple comparisons for body weight

| Day | Bonferroni's multiple comparisons test | Mean Diff. | 95.00% CI of diff. | Significant? | Summary | Adjusted P Value |
|-----|----------------------------------------|------------|--------------------|--------------|---------|------------------|
| 0   | Myricetin alone vs. Control            | 0          | -3.803 to 3.803    | No           | ns      | >0.9999          |
|     | Oxaliplatin alone vs. Control          | 0          | -3.803 to 3.803    | No           | ns      | >0.9999          |
|     | Combination vs. Control                | 0          | -3.803 to 3.803    | No           | ns      | >0.9999          |
|     | Oxaliplatin alone vs. Myricetin alone  | 0          | -3.803 to 3.803    | No           | ns      | >0.9999          |
|     | Combination vs. Myricetin alone        | 0          | -3.803 to 3.803    | No           | ns      | >0.9999          |
|     | Combination vs. Oxaliplatin alone      | 0          | -3.803 to 3.803    | No           | ns      | >0.9999          |
| 3   | Myricetin alone vs. Control            | 1.483      | -2.32 to 5.285     | No           | ns      | >0.9999          |
|     | Oxaliplatin alone vs. Control          | -1.05      | -4.853 to 2.753    | No           | ns      | >0.9999          |
|     | Combination vs. Control                | -2.496     | -6.299 to 1.306    | No           | ns      | 0.4916           |
|     | Oxaliplatin alone vs. Myricetin alone  | -2.533     | -6.335 to 1.27     | No           | ns      | 0.4657           |
|     | Combination vs. Myricetin alone        | -3.979     | -7.781 to -0.1761  | Yes          | *       | 0.0348           |
|     | Combination vs. Oxaliplatin alone      | -1.446     | -5.249 to 2.356    | No           | ns      | >0.9999          |
| 7   | Myricetin alone vs. Control            | 0.4488     | -3.354 to 4.251    | No           | ns      | >0.9999          |
|     | Oxaliplatin alone vs. Control          | -1.694     | -5.496 to 2.109    | No           | ns      | >0.9999          |
|     | Combination vs. Control                | -4.064     | -7.866 to -0.2611  | Yes          | *       | 0.0291           |
|     | Oxaliplatin alone vs. Myricetin alone  | -2.143     | -5.945 to 1.66     | No           | ns      | 0.8105           |
|     | Combination vs. Myricetin alone        | -4.513     | -8.315 to -0.7099  | Yes          | *       | 0.0108           |
|     | Combination vs. Oxaliplatin alone      | -2.37      | -6.173 to 1.433    | No           | ns      | 0.591            |
| 10  | Myricetin alone vs. Control            | -0.585     | -4.388 to 3.218    | No           | ns      | >0.9999          |
|     | Oxaliplatin alone vs. Control          | -3.231     | -7.034 to 0.5714   | No           | ns      | 0.148            |
|     | Combination vs. Control                | -4.484     | -8.286 to -0.6811  | Yes          | *       | 0.0116           |
|     | Oxaliplatin alone vs. Myricetin alone  | -2.646     | -6.449 to 1.156    | No           | ns      | 0.3917           |
|     | Combination vs. Myricetin alone        | -3.899     | -7.701 to -0.09613 | Yes          | *       | 0.0411           |
|     | Combination vs. Oxaliplatin alone      | -1.253     | -5.055 to 2.55     | No           | ns      | >0.9999          |
| 14  | Myricetin alone vs. Control            | 0.9063     | -2.896 to 4.709    | No           | ns      | >0.9999          |
|     | Oxaliplatin alone vs. Control          | -1.299     | -5.101 to 2.504    | No           | ns      | >0.9999          |
|     | Combination vs. Control                | -2.273     | -6.075 to 1.53     | No           | ns      | 0.6784           |
|     | Oxaliplatin alone vs. Myricetin alone  | -2.205     | -6.008 to 1.598    | No           | ns      | 0.7447           |
|     | Combination vs. Myricetin alone        | -3.179     | -6.981 to 0.6239   | No           | ns      | 0.1624           |
|     | Combination vs. Oxaliplatin alone      | -0.9738    | -4.776 to 2.829    | No           | ns      | >0.9999          |
| 17  | Myricetin alone vs. Control            | -0.00625   | -3.809 to 3.796    | No           | ns      | >0.9999          |
|     | Oxaliplatin alone vs. Control          | -3.216     | -7.019 to 0.5864   | No           | ns      | 0.152            |
|     | Combination vs. Control                | -3.91      | -7.713 to -0.1074  | Yes          | *       | 0.0402           |
|     | Oxaliplatin alone vs. Myricetin alone  | -3.21      | -7.013 to 0.5926   | No           | ns      | 0.1537           |
|     | Combination vs. Myricetin alone        | -3.904     | -7.706 to -0.1011  | Yes          | *       | 0.0407           |
|     | Combination vs. Oxaliplatin alone      | -0.6938    | -4.496 to 3.109    | No           | ns      | >0.9999          |
| 21  | Myricetin alone vs. Control            | -1.593     | -5.395 to 2.21     | No           | ns      | >0.9999          |
|     | Oxaliplatin alone vs. Control          | -2.578     | -6.38 to 1.225     | No           | ns      | 0.4352           |
|     | Combination vs. Control                | -4         | -7.803 to -0.1974  | Yes          | *       | 0.0333           |
|     | Oxaliplatin alone vs. Myricetin alone  | -0.985     | -4.788 to 2.818    | No           | ns      | >0.9999          |
|     | Combination vs. Myricetin alone        | -2.408     | -6.21 to 1.395     | No           | ns      | 0.56             |
|     | Combination vs. Oxaliplatin alone      | -1.423     | -5.225 to 2.38     | No           | ns      | >0.9999          |
| 24  | Myricetin alone vs. Control            | -1.814     | -5.616 to 1.989    | No           | ns      | >0.9999          |
|     | Oxaliplatin alone vs. Control          | -3.42      | -7.223 to 0.3826   | No           | ns      | 0.1049           |
|     | Combination vs. Control                | -5.454     | -9.256 to -1.651   | Yes          | **      | 0.001            |
|     | Oxaliplatin alone vs. Myricetin alone  | -1.606     | -5.409 to 2.196    | No           | ns      | >0.9999          |
|     | Combination vs. Myricetin alone        | -3.64      | -7.443 to 0.1626   | No           | ns      | 0.069            |
|     | Combination vs. Oxaliplatin alone      | -2.034     | -5.836 to 1.769    | No           | ns      | 0.9356           |

Supplementary table 2 Two-way repeated measures ANOVA multiple comparisons for tumour volume

| Day                      | Bonferroni's multiple comparisons test | Mean Diff.      | 95.00% CI of diff. | Significant? | Summary | Adjusted P Value |
|--------------------------|----------------------------------------|-----------------|--------------------|--------------|---------|------------------|
| 0                        | Control vs. Myricetin alone            | 0               | -167.8 to 167.8    | No           | ns      | >0.9999          |
|                          | Control vs. ox alone                   | 0               | -167.8 to 167.8    | No           | ns      | >0.9999          |
|                          | Control vs. combination                | 0               | -167.8 to 167.8    | No           | ns      | >0.9999          |
|                          | Myricetin alone vs. ox alone           | 0               | -167.8 to 167.8    | No           | ns      | >0.9999          |
|                          | Myricetin alone vs. combination        | 0               | -167.8 to 167.8    | No           | ns      | >0.9999          |
| ox alone vs. combination | 0                                      | -167.8 to 167.8 | No                 | ns           | >0.9999 |                  |
| 3                        | Control vs. Myricetin alone            | -13.83          | -181.6 to 154      | No           | ns      | >0.9999          |
|                          | Control vs. ox alone                   | 13.08           | -154.7 to 180.9    | No           | ns      | >0.9999          |
|                          | Control vs. combination                | 33.59           | -134.2 to 201.4    | No           | ns      | >0.9999          |
|                          | Myricetin alone vs. ox alone           | 26.91           | -140.9 to 194.7    | No           | ns      | >0.9999          |
|                          | Myricetin alone vs. combination        | 47.42           | -120.4 to 215.2    | No           | ns      | >0.9999          |
| ox alone vs. combination | 20.51                                  | -147.3 to 188.3 | No                 | ns           | >0.9999 |                  |
| 7                        | Control vs. Myricetin alone            | -72.29          | -240.1 to 95.5     | No           | ns      | >0.9999          |
|                          | Control vs. ox alone                   | 18.91           | -148.9 to 186.7    | No           | ns      | >0.9999          |
|                          | Control vs. combination                | 59.02           | -108.8 to 226.8    | No           | ns      | >0.9999          |
|                          | Myricetin alone vs. ox alone           | 91.21           | -76.59 to 259      | No           | ns      | 0.8959           |
|                          | Myricetin alone vs. combination        | 131.3           | -36.49 to 299.1    | No           | ns      | 0.2303           |
| ox alone vs. combination | 40.1                                   | -127.7 to 207.9 | No                 | ns           | >0.9999 |                  |
| 10                       | Control vs. Myricetin alone            | -119.7          | -287.4 to 48.14    | No           | ns      | 0.3538           |
|                          | Control vs. ox alone                   | 16.53           | -151.3 to 184.3    | No           | ns      | >0.9999          |
|                          | Control vs. combination                | 78.77           | -89.03 to 246.6    | No           | ns      | >0.9999          |
|                          | Myricetin alone vs. ox alone           | 136.2           | -31.61 to 304      | No           | ns      | 0.1908           |
|                          | Myricetin alone vs. combination        | 198.4           | 30.62 to 366.2     | Yes          | *       | 0.0112           |
| ox alone vs. combination | 62.24                                  | -105.6 to 230   | No                 | ns           | >0.9999 |                  |
| 14                       | Control vs. Myricetin alone            | -117.1          | -284.9 to 50.69    | No           | ns      | 0.3871           |
|                          | Control vs. ox alone                   | -24.7           | -192.5 to 143.1    | No           | ns      | >0.9999          |
|                          | Control vs. combination                | 109.6           | -58.22 to 277.4    | No           | ns      | 0.5012           |
|                          | Myricetin alone vs. ox alone           | 92.41           | -75.39 to 260.2    | No           | ns      | 0.8644           |
|                          | Myricetin alone vs. combination        | 226.7           | 58.88 to 394.5     | Yes          | **      | 0.0024           |
| ox alone vs. combination | 134.3                                  | -33.52 to 302.1 | No                 | ns           | 0.2055  |                  |
| 17                       | Control vs. Myricetin alone            | -192.7          | -360.5 to -24.95   | Yes          | *       | 0.015            |
|                          | Control vs. ox alone                   | -92.33          | -260.1 to 75.46    | No           | ns      | 0.8663           |
|                          | Control vs. combination                | 127.2           | -40.57 to 295      | No           | ns      | 0.2685           |
|                          | Myricetin alone vs. ox alone           | 100.4           | -67.38 to 268.2    | No           | ns      | 0.6755           |
|                          | Myricetin alone vs. combination        | 320             | 152.2 to 487.8     | Yes          | ****    | <0.0001          |
| ox alone vs. combination | 219.6                                  | 51.76 to 387.4  | Yes                | **           | 0.0036  |                  |
| 21                       | Control vs. Myricetin alone            | -207.3          | -375.1 to -39.55   | Yes          | **      | 0.007            |
|                          | Control vs. ox alone                   | -97.44          | -265.2 to 70.35    | No           | ns      | 0.7414           |
|                          | Control vs. combination                | 126             | -41.83 to 293.8    | No           | ns      | 0.2814           |
|                          | Myricetin alone vs. ox alone           | 109.9           | -57.89 to 277.7    | No           | ns      | 0.4957           |
|                          | Myricetin alone vs. combination        | 333.3           | 165.5 to 501.1     | Yes          | ****    | <0.0001          |
| ox alone vs. combination | 223.4                                  | 55.61 to 391.2  | Yes                | **           | 0.0029  |                  |
| 24                       | Control vs. Myricetin alone            | -105.3          | -273.1 to 62.46    | No           | ns      | 0.5766           |
|                          | Control vs. ox alone                   | -165.5          | -333.3 to 2.336    | No           | ns      | 0.0556           |
|                          | Control vs. combination                | 188.7           | 20.86 to 356.5     | Yes          | *       | 0.0184           |
|                          | Myricetin alone vs. ox alone           | -60.12          | -227.9 to 107.7    | No           | ns      | >0.9999          |
|                          | Myricetin alone vs. combination        | 294             | 126.2 to 461.8     | Yes          | ****    | <0.0001          |
| ox alone vs. combination | 354.1                                  | 186.3 to 521.9  | Yes                | ****         | <0.0001 |                  |

**Supplementary table 3 Results of multiple comparisons for time to event endpoints .**

| Comparison                               | P values (unadjusted) |                                         |
|------------------------------------------|-----------------------|-----------------------------------------|
|                                          | Time to euthanasia    | Time for tumours to quadruple in volume |
| All groups                               | <b>0.0032</b>         | <b>0.0112</b>                           |
| Control versus myricetin alone           | 0.0989                | 0.1776                                  |
| Control versus oxaliplatin alone         | 0.0848                | 0.1278                                  |
| Oxaliplatin alone versus myricetin alone | 0.1217                | 0.6605                                  |
| Combination versus control               | 0.0968                | <b>0.0454</b>                           |
| Combination versus myricetin alone       | <b>0.0181</b>         | <b>0.0150</b>                           |
| Combination versus oxaliplatin alone     | <b>0.0003</b>         | <b>0.0016</b>                           |
